# Supplementary material for: Association between Family Functioning, Child Emotional and Behavioral Problems, and Parental Stress during the COVID-19 Pandemic in Thailand
Source: MDPI journal article supplement (doi:10.3390/bs14040270), 2024-03-24
Supplement: s1 [file s1]

**Table S1.** The Pearson correlation coefficients of study variables.

| Variables                    | 1        | 2        | 3        | 4        | 5        | 6        | 7        | 8        | 9        | 10      | 11       | 12      | 13       | 14      | 15       | 16       | 17       | 18 |
|------------------------------|----------|----------|----------|----------|----------|----------|----------|----------|----------|---------|----------|---------|----------|---------|----------|----------|----------|----|
| 1. Parental stress           | 1        |          |          |          |          |          |          |          |          |         |          |         |          |         |          |          |          |    |
| 2. Emotional problems change | 0.2500*  | 1        |          |          |          |          |          |          |          |         |          |         |          |         |          |          |          |    |
| 3. Conduct problem change    | 0.2126*  | 0.4918*  | 1        |          |          |          |          |          |          |         |          |         |          |         |          |          |          |    |
| 4. Hyperactivity change      | 0.2141*  | 0.4066*  | 0.5587*  | 1        |          |          |          |          |          |         |          |         |          |         |          |          |          |    |
| 5. Peer problems change      | 0.1819*  | 0.3481*  | 0.3261*  | 0.2946*  | 1        |          |          |          |          |         |          |         |          |         |          |          |          |    |
| 6. Prosocial behavior change | -0.0434  | -0.2625* | -0.3707* | -0.3724* | -0.304*  | 1        |          |          |          |         |          |         |          |         |          |          |          |    |
| 7. Family strength           | 0.1632*  | 0.0595   | 0.0856*  | 0.1002*  | -0.0102  | 0.0005   | 1        |          |          |         |          |         |          |         |          |          |          |    |
| 8. Family difficulty         | 0.3355*  | 0.1446*  | 0.1156*  | 0.0810*  | 0.0394   | -0.0574  | 0.2877*  | 1        |          |         |          |         |          |         |          |          |          |    |
| 9. Family communication      | 0.2101*  | 0.0950*  | 0.0872*  | 0.0614   | 0.0058   | -0.0326  | 0.3641*  | 0.6446*  | 1        |         |          |         |          |         |          |          |          |    |
| 10. Income                   | -0.0549  | -0.045   | -0.0334  | 0.0177   | 0.0197   | 0.0936*  | -0.1177* | -0.1558* | -0.0839* | 1       |          |         |          |         |          |          |          |    |
| 11. Child's age              | -0.0696* | -0.0408  | -0.0486  | -0.029   | -0.0564  | -0.0829* | -0.0079  | -0.0711* | -0.0606  | 0.0185  | 1        |         |          |         |          |          |          |    |
| 12. Psychiatric diagnosis    | 0.1147*  | 0.0714*  | 0.0571   | 0.0481   | 0.0125   | -0.023   | 0.0605   | 0.0669*  | 0.0206   | 0.0372  | 0.0676*  | 1       |          |         |          |          |          |    |
| 13. Sleep problems           | 0.3463*  | 0.2335*  | 0.1692*  | 0.1818*  | 0.1108*  | -0.0736* | 0.1176*  | 0.2071*  | 0.1507*  | -0.0114 | -0.0553  | 0.1392* | 1        |         |          |          |          |    |
| 14. Appetite change          | -0.1558* | -0.0965* | -0.1343* | -0.0875* | -0.0843* | 0.0952*  | -0.0737* | -0.1147* | -0.0913* | 0.0613  | -0.044   | -0.0619 | -0.1459* | 1       |          |          |          |    |
| 15. Physical activities      | -0.0802* | -0.0999* | -0.0693* | -0.1115* | -0.1211* | 0.1305*  | -0.0688* | 0.0025   | 0.0086   | -0.0254 | -0.1590* | -0.0537 | -0.0622  | 0.0531  | 1        |          |          |    |
| 16. Recreational activities  | -0.0375  | -0.0754* | -0.1441* | -0.1234* | -0.0488  | 0.1533*  | -0.1566* | -0.0663* | -0.0518  | 0.0521  | -0.2061* | -0.0387 | -0.0508  | 0.0915* | 0.1356*  | 1        |          |    |
| 17. Family time              | -0.0385  | -0.0389  | -0.1343* | -0.1518* | -0.0185  | 0.1105*  | -0.1064* | -0.0439  | -0.0442  | 0.0227  | -0.2131* | 0.0151  | -0.0469  | 0.0938* | 0.2698*  | 0.4378*  | 1        |    |
| 18. Screen time              | 0.1006*  | 0.0980*  | 0.1551*  | 0.1453*  | 0.0619   | -0.0893* | 0.0846*  | 0.0511   | 0.0846*  | -0.0025 | 0.2324*  | 0.0416  | 0.0686*  | -0.0555 | -0.1690* | -0.2842* | -0.2059* | 1  |

\* Significant association between variable derived from the correlation analysis.
